# Supplementary material
Source: PubMed Central journal article supplement (PMC7061745)
Supplement: ajcr0010-0507-f8.pdf [file ajcr0010-0507-f8.pdf]

# TFT has anti-TNBC activity

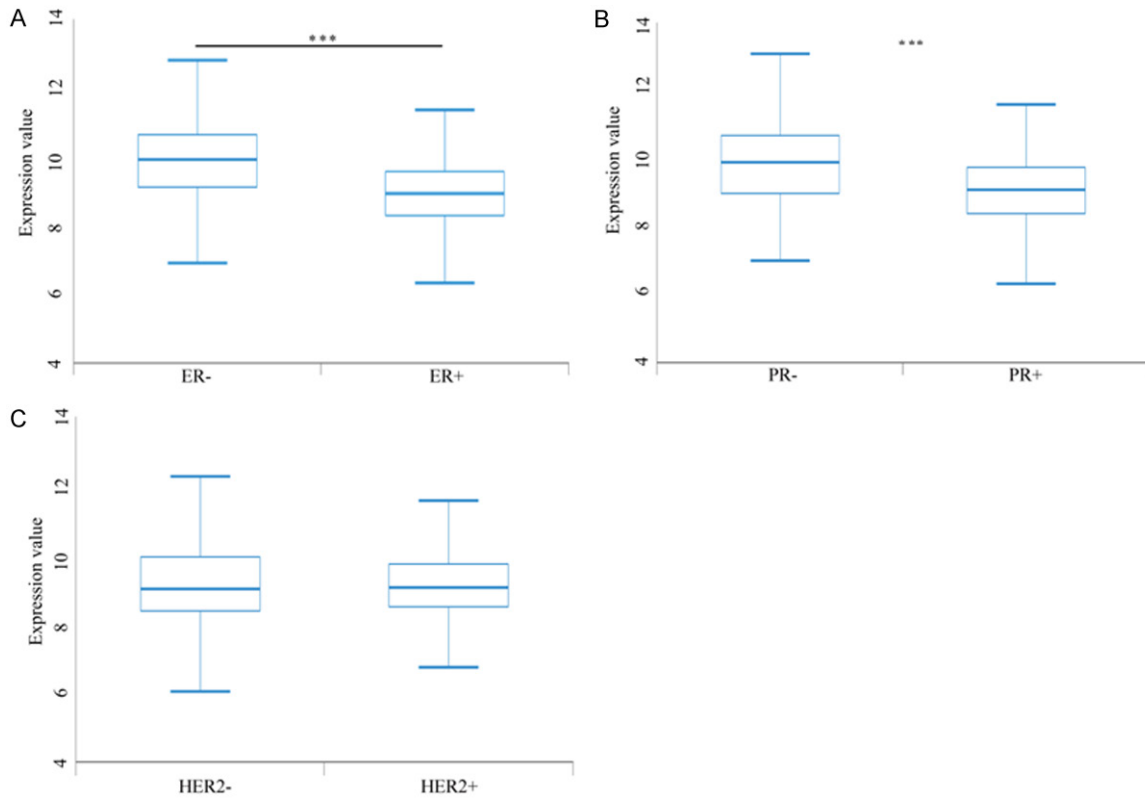

**Supplementary Figure 1.** TS mRNA transcripts in ER+ and ER- (A), PR+ and PR- (B), HER2+ and HER2- (C) breast cancers in the GEPIA database. \*\*\* $P < 0.001$  vs. the control.
